# Supplementary material for: The national MD-PhD program outcomes study: Relationships between medical specialty, training duration, research effort, and career paths
Source: JCI journal article supplement (doi:10.1172/jci.insight.133009), 2019-10-02
Supplement: sd1 [file 1]

**The national MD-PhD program outcomes study: Relationships between specialty,  
training duration, research effort and career paths**

Lawrence F. Brass, MD PhD<sup>a</sup> and Myles H. Akabas, MD PhD<sup>b</sup>

Address Correspondence to: both authors

<sup>a</sup>Professor of Medicine

Professor of Systems Pharmacology and Translational Therapeutics

University of Pennsylvania Perelman School of Medicine

Room 815 BRB-II/II

421 Curie Blvd

Philadelphia, PA 19104

[brass@Pennmedicine.upenn.edu](mailto:brass@Pennmedicine.upenn.edu)

<sup>b</sup>Professor of Physiology & Biophysics, Neuroscience, and Medicine

Albert Einstein College of Medicine

1300 Morris Park Avenue

Bronx, NY 10461

[myles.akabas@einstein.yu.edu](mailto:myles.akabas@einstein.yu.edu)

## Supplementary Figures

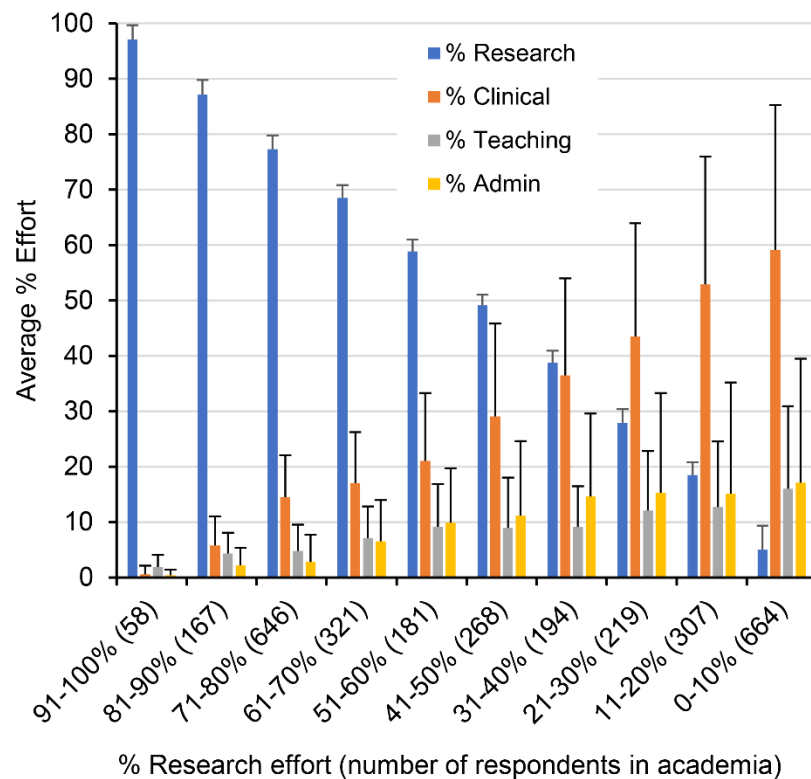

**Supplementary Figure S1. Distribution of reported research and clinical effort.** The data in Figure 2A are plotted in bar graph format showing the average percent effort reported for research, clinical, teaching, and administrative effort for 3,017 survey respondents with a current position in academia full time broken down by research effort deciles. The mean and standard error are plotted.

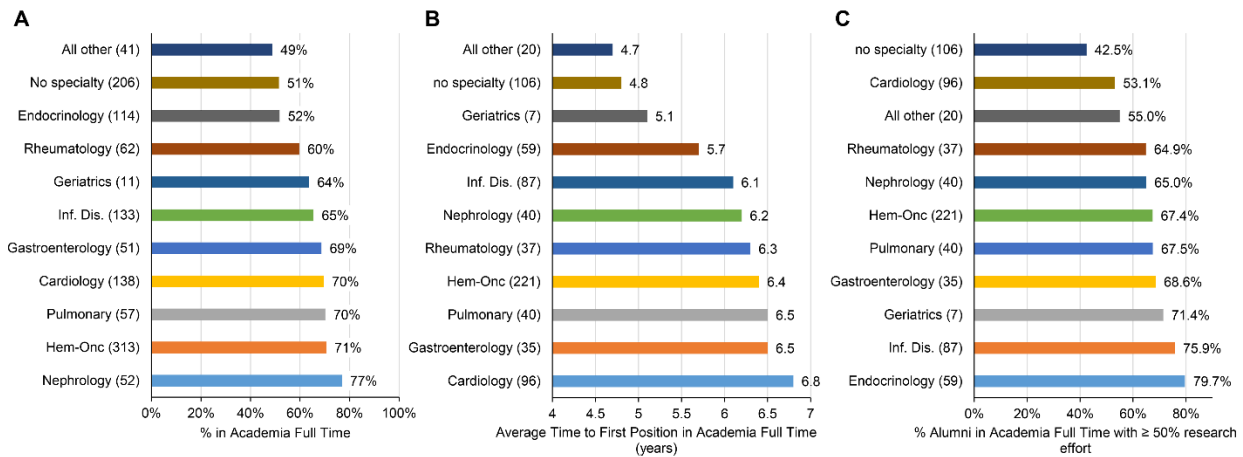

**Supplementary Figure S2. Subspecialty fellowship training choices for the survey respondents who training in internal medicine (N=1178).** Note that approximately 17% of respondents did not indicate a clinical subspecialty. **(A)** Percent of alumni in academia full time. **(B)** Average time to first position in academia. **(C)** Percent of alumni in academia who reported ≥50% research effort.

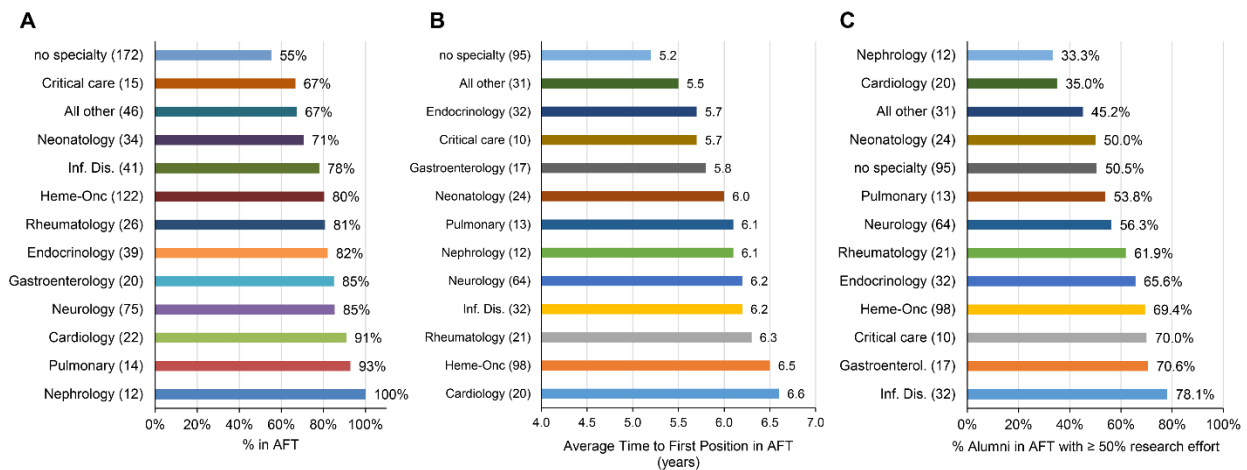

**Supplementary Figure S3. Subspecialty fellowship training choices for the survey respondents who training in pediatrics (N=583).** Note that approximately 30% of respondents did not indicate a clinical subspecialty. **(A)** Percent of alumni in academia full time. **(B)** Average time to first position in academia. **(C)** Percent of alumni in academia who reported ≥50% research effort.
